# Supplementary material for: Design of Injectable Bioartificial Hydrogels by Green Chemistry for Mini-Invasive Applications in the Biomedical or Aesthetic Medicine Fields
Source: MDPI journal article supplement (doi:10.3390/gels9010059), 2023-01-11
Supplement: s1 [file s1]

# Design of Injectable Bioartificial Hydrogels by Green Chemistry for Mini-Invasive Applications in the Biomedical or Aesthetic Medicine Fields

Rossella Laurano <sup>1,§,\*</sup>, Monica Boffito <sup>1,2,§</sup>, Claudio Cassino <sup>3</sup>, Francesco Liberti<sup>1</sup>, Gianluca Ciardelli <sup>1,2,#</sup> and Valeria Chiono <sup>1,2,#</sup>

<sup>1</sup> Department of Mechanical and Aerospace Engineering, Politecnico di Torino, 10129, Torino, Italy

<sup>2</sup> Institute for Chemical-Physical Processes, National Research Council (CNR-IPCF), 56124, Pisa, Italy

<sup>3</sup> Department of Science and Technological Innovation, Università del Piemonte Orientale, 15121, Alessandria, Italy

\* Correspondence: rossella.laurano@polito.it;

§ These authors equally contributed to this work

# These authors share the last co-authorship

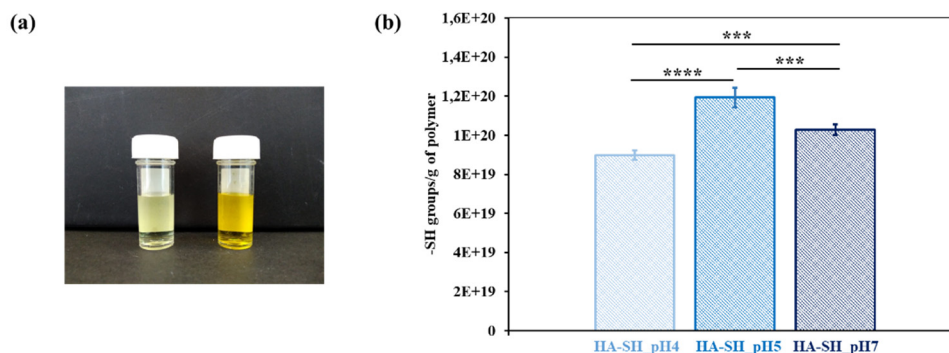

**Figure S1.** (a) Ellman's colorimetric assay performed on HA (left) and HA-SH\_pH5 (right): the strong yellowish color of HA-SH\_pH5 compared to HA (control) proves the successful exposure of free sulfhydryl groups along Cys-functionalized HA; (b) Number of exposed -SH groups along HA-SH\_pHX samples as quantified through the Ellman's colorimetric assay. Results for HA-SH\_pH4, HA-SH\_pH5 and HA-SH\_pH7 are reported in light blue, blue and dark blue, respectively.

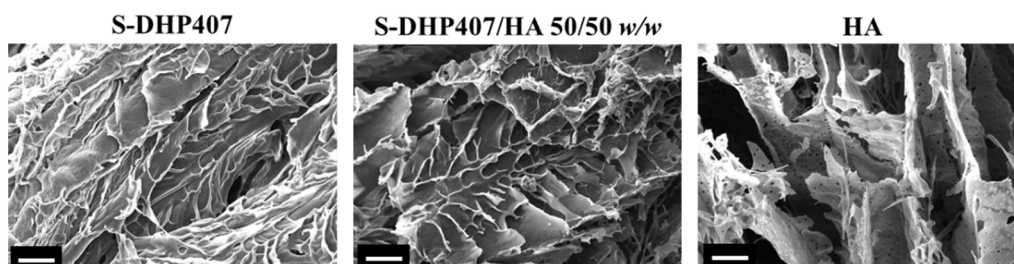

**Figure S2.** SEM images of samples based on virgin polymers (i.e., S-DHP407 and HA) and on their 50/50 *w/w* blend. Scale bar: 100  $\mu$ m.

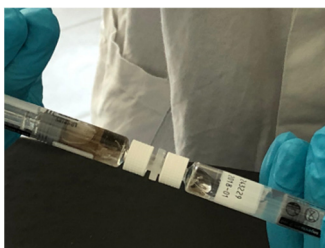

**Figure S3.** Representative photo of the Luer-lock double syringe system used for bioartificial hydrogel preparation. To ensure complete mixing, polymeric formulations were pipetted up and down 5 times.
